# Supplementary material for: Antihyaluronidase and Antioxidant Potential of Atriplex sagittata Borkh. in Relation to Phenolic Compounds and Triterpene Saponins
Source: MDPI journal article supplement (doi:10.3390/molecules28030982), 2023-01-18
Supplement: s1 [file s1]

# Antihyaluronidase and Antioxidant Potential of *Atriplex sagittata* Borkh. in Relation to Phenolic Compounds and Triterpene Saponins

Karolina Grabowska <sup>1</sup>, Wioleta Pietrzak <sup>2</sup>, Paweł Paśko <sup>3</sup>, Agnieszka Sołtys <sup>1</sup>, Agnieszka Galanty <sup>1</sup>, Paweł Żmudzki <sup>4</sup>, Renata Nowak <sup>2</sup> and Irma Podolak <sup>1,\*</sup>

<sup>1</sup> Department of Pharmacognosy, Medical College, Jagiellonian University, Medyczna 9, 30-688 Kraków, Poland

<sup>2</sup> Department of Pharmaceutical Botany, Medical University, 1 W. Chodźki, 20-093 Lublin, Poland

<sup>3</sup> Department of Food Chemistry and Nutrition, Medical College, Jagiellonian University, 9 Medyczna, 30-688 Kraków, Poland

<sup>4</sup> Department of Medicinal Chemistry, Medical College, Jagiellonian University, 9 Medyczna, 30-688 Kraków, Poland

\* Correspondence: irma.podolak@uj.edu.pl; Tel.: +48-(12)-620-55-60

## Table of contents:

**Table S1.** Optimized parameters for the quantitative analysis of phenolic acids.

**Table S2.** Analytical parameters of the quantitative LC-MS/MS method for determination of phenolic acids.

**Table S3.** Optimized parameters for the quantitative analysis of flavonoids.

**Table S4.** Analytical parameters of the quantitative LC-MS/MS method for determination of flavonoids.

**Figure S1.** Structures of compounds 1 (calendulose E) and 2 (chikusetsusaponin IVa).

**Figure S2.** UPLC-PDA chromatogram of compound 1.

**Figure S3.** ESI-QTOF-MS (negative and positive ion mode) of compound 1.

**Figure S4.** <sup>1</sup>H NMR (500 MHz, pyridine-d<sub>5</sub>) spectrum of compound 1.

**Figure S5.** <sup>13</sup>C NMR (125 MHz, pyridine-d<sub>5</sub>) spectrum of compound 1.

**Figure S6.** UPLC-PDA chromatogram of compound 2.

**Figure S7.** ESI-QTOF-MS (negative and positive ion mode) of compound 2.

**Figure S8.** <sup>1</sup>H NMR (500 MHz, pyridine-d<sub>5</sub>) spectrum of compound 2.

**Figure S9.** <sup>13</sup>C NMR (125 MHz, pyridine-d<sub>5</sub>) spectrum of compound 2.

**Table S5.** <sup>1</sup>H (500 MHz) and <sup>13</sup>C (125 MHz) NMR spectral data (δ ppm) for compound 1 and 2 (pyridine-d<sub>5</sub>).

**Table S1.** Optimized parameters for the quantitative analysis of phenolic acids.

| Compound              | Retention time [min] | MRM (Q1/Q3) [m/z] | DP [V] | EP [V] | CEP [V] | CE [eV] | CXP [V] |
|-----------------------|----------------------|-------------------|--------|--------|---------|---------|---------|
| gallic acid           | 1.01                 | 168.7/78.9        | -35    | -3     | -12     | -36     | 0       |
|                       |                      | 168.7/124.9       | -35    | -3     | -12     | -14     | 0       |
| protocatechuic        | 2.25                 | 152.9/80.9        | -55    | -1     | -10     | -26     | 0       |
|                       |                      | 152.9/107.8       | -55    | -1     | -10     | -38     | 0       |
| gentisic acid         | 3.34                 | 352.9/80          | -70    | -4     | -16     | -110    | 0       |
|                       |                      | 352.9/96.9        | -70    | -4     | -16     | -52     | 0       |
| 4-hydroxybenzoic acid | 4.24                 | 136.8/92.9        | -30    | -7     | -10     | -18     | 0       |
| vanillic acid         | 5.52                 | 166.8/107.9       | -35    | -4     | -12     | -18     | 0       |
|                       |                      | 166.8/123         | -35    | -4     | -12     | -12     | 0       |
| caffeic acid          | 5.75                 | 178.7/88.9        | -30    | -6,5   | -12     | -46     | 0       |
|                       |                      | 178.7/134.9       | -30    | -6,5   | -12     | -16     | 0       |
| syringic acid         | 6.34                 | 196.9/122.8       | -30    | -9     | -12     | -24     | 0       |
|                       |                      | 196.9/181.9       | -30    | -9     | -12     | -12     | -2      |
| 4-hydroxycynamic acid | 6.70                 | 162.8/93          | -30    | -8     | -12     | -44     | 0       |
|                       |                      | 162.8/119         | -30    | -8     | -12     | -14     | 0       |
| ferulic acid          | 6.84                 | 192.8/133.9       | -25    | -11,5  | -14     | -16     | 0       |
|                       |                      | 192.8/177.9       | -25    | -11,5  | -14     | -12     | -2      |
| salicylic acid        | 6.86                 | 136.9/75          | -35    | -4     | -10     | -48     | 0       |
|                       |                      | 136.9/93          | -35    | -4     | -10     | -16     | -2      |
| sinapic acid          | 6.87                 | 222.8/121         | -35    | -8,5   | -10     | -36     | 0       |
|                       |                      | 222.8/148.9       | -35    | -8,5   | -10     | -20     | 0       |
| veratric acid         | 6.88                 | 180.7/121.9       | -35    | -6     | -14     | -18     | 0       |
|                       |                      | 180.7/136.9       | -35    | -6     | -14     | -12     | 0       |
| 3-hydroxycynamic acid | 6.89                 | 162.8/91          | -35    | -4,5   | -12     | -36     | 0       |
|                       |                      | 162.8/119         | -35    | -4,5   | -12     | -14     | 0       |
| rosmarinic acid       | 7.01                 | 358.7/132.6       | -50    | -5     | -26     | -44     | 0       |
|                       |                      | 358.7/160.8       | -50    | -5     | -26     | -20     | -2      |

Abbreviations: Q1 – precursor ion, Q3 – product ion, <sup>a</sup>DP- Declustering Potential; <sup>b</sup>EP- Entrance Potential; <sup>c</sup>CEP- Cell Entrance Potential; <sup>d</sup>CE- Collision Energy; <sup>e</sup>CXP- Collision Cell Exit Potential.

**Table S2.** Analytical parameters of the quantitative LC-MS/MS method for determination of phenolic acids.

| Compound              | LOD [ng/mL] | LOQ [ng/mL] | R <sup>2</sup> | Linear range [ng/mL] |
|-----------------------|-------------|-------------|----------------|----------------------|
| gallic acid           | 50          | 100         | 0.9995         | 100-50000            |
| protocatechuic        | 10          | 60          | 0.9993         | 60-12000             |
| gentisic acid         | 8           | 15          | 0.9982         | 30-7500              |
| 4-hydroxybenzoic acid | 30          | 50          | 0.9990         | 50-50000             |
| vanillic acid         | 60          | 120         | 0.9994         | 120-30000            |
| caffeic acid          | 60          | 315         | 0.9976         | 313-6250             |
| syringic acid         | 50          | 155         | 0.9986         | 155-7750             |
| 4-hydroxycynamic acid | 20          | 30          | 0.9980         | 30-7500              |
| ferulic acid          | 15          | 25          | 0.9982         | 25-5000              |
| salicylic acid        | 5           | 10          | 0.9979         | 44-1000              |
| sinapic acid          | 7           | 30          | 0.9992         | 30-6000              |
| veratric acid         | 100         | 500         | 0.9975         | 500-25000            |
| 3-hydroxycynamic acid | 25          | 100         | 0.9994         | 100-25000            |
| rosmarinic acid       | 20          | 25          | 0.9995         | 25-25000             |

Abbreviations: LOD -limit of detection. LOQ -limit of quantification. R<sup>2</sup>- determination coefficient.

**Table S3.** Optimized parameters for the quantitative analysis of flavonoids.

| Compound                            | Retention<br>time [min] | Q1<br>[m/z] | Q3<br>[m/z] | DP <sup>a</sup><br>[V] | EP <sup>b</sup><br>[V] | CEP <sup>c</sup><br>[V] | CE <sup>d</sup><br>[eV] | CXP <sup>e</sup><br>[V] |
|-------------------------------------|-------------------------|-------------|-------------|------------------------|------------------------|-------------------------|-------------------------|-------------------------|
| kaempferol-3-glucoside-7-rhamnoside | 11.25                   | 592.818     | 284.9       | -145                   | -4.5                   | -30                     | -42                     | -4                      |
|                                     |                         |             | 430.9       | -145                   | -4.5                   | -30                     | -36                     | -16                     |
| rutin                               | 11.99                   | 608.745     | 299.6       | -90                    | -8                     | -30                     | -46                     | -4                      |
|                                     |                         |             | 270.9       | -90                    | -8                     | -30                     | -60                     | -4                      |
| isovitexin/vitexin                  | 12.4                    | 430.821     | 310.9       | -65                    | -4.5                   | -18                     | -28                     | -4                      |
|                                     |                         |             | 340.9       | -65                    | -4.5                   | -18                     | -26                     | -14                     |
| isoquercetin                        | 13                      | 462.739     | 299.7       | -85                    | -1.5                   | -20                     | -30                     | -4                      |
|                                     |                         |             | 270.7       | -85                    | -1.5                   | -20                     | -44                     | -4                      |
| kaempferol-3-rutinoside             | 13.31                   | 592.697     | 284.8       | -65                    | -12                    | -30                     | -38                     | -2                      |
|                                     |                         |             | 226.7       | -65                    | -12                    | -30                     | -68                     | -2                      |
| narcisoside                         | 13.52                   | 622.817     | 314.9       | -90                    | -4.5                   | -30                     | -40                     | -4                      |
|                                     |                         |             | 298.8       | -90                    | -4.5                   | -30                     | -52                     | -4                      |
| naringin                            | 14.50                   | 579.109     | 151         | -80                    | -4                     | -26                     | -54                     | -2                      |
|                                     |                         |             | 271         | -80                    | -4                     | -26                     | -42                     | -4                      |
| astragalin                          | 14.66                   | 446.72      | 226.8       | -75                    | -9                     | -20                     | -54                     | -2                      |
|                                     |                         |             | 254.8       | -75                    | -9                     | -20                     | -40                     | -2                      |
| isorhamnetin-3-glucoside            | 14.76                   | 476.807     | 313.9       | -95                    | -10                    | -22                     | -30                     | -4                      |
|                                     |                         |             | 270.9       | -95                    | -10                    | -22                     | -44                     | -4                      |

Abbreviations: Abbreviations: Q1 – precursor ion, Q3 – product ion <sup>a</sup>DP- Declustering Potential; - <sup>b</sup>EP- Entrance Potential; <sup>c</sup>CEP- Cell Entrance Potential; <sup>d</sup>CE- Collision Energy; <sup>e</sup>CXP- Collision Cell Exit Potential.

**Table S4.** Analytical parameters of the quantitative LC-MS/MS method for determination of flavonoids.

| Compound                                 | LOD<br>[ng/mL] | LOQ<br>[ng/ mL] | R <sup>2</sup> | Linear range<br>[ng/ mL] |
|------------------------------------------|----------------|-----------------|----------------|--------------------------|
| kaempferol-3-glucoside-7-rham-<br>noside | 90             | 150             | 0.9980         | 400-40000                |
| rutin                                    | 100            | 250             | 0.9973         | 2000-28000               |
| isovitexin/vitexin                       | 100            | 250             | 0.9989         | 2500-80000               |
| isoquercetin                             | 167            | 250             | 0.9987         | 2000-25000               |
| kaempferol-3-rutinoside                  | 50             | 100             | 0.9991         | 200-20000                |
| narcisoside                              | 50             | 100             | 0.9975         | 200-20000                |
| naringin                                 | 50             | 100             | 0.9985         | 1000-25000               |
| astragalin                               | 120            | 240             | 0.9978         | 1200-24000               |
| isorhamnetin-3-glucoside                 | 100            | 200             | 0.9985         | 2000-20000               |

Abbreviations: LOD -limit of detection. LOQ -limit of quantification. R<sup>2</sup>- determination coefficient.

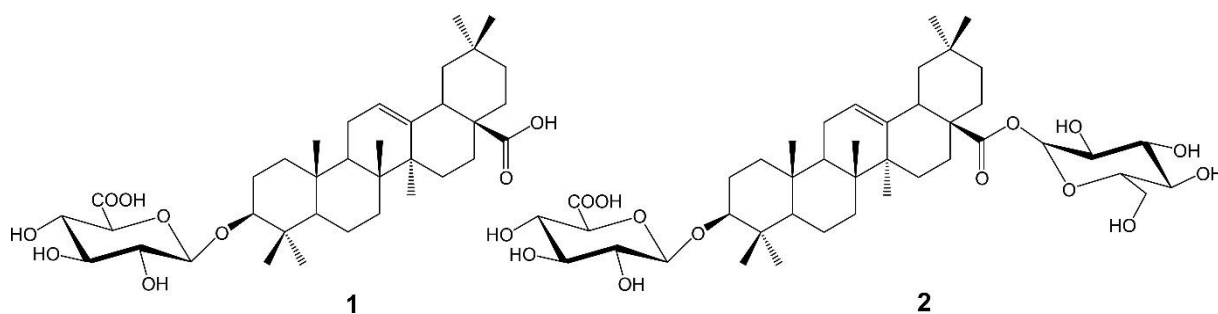

**Figure S1.** Structures of compounds 1 (calendulose E) and 2 (chikusetsusaponin IVa).

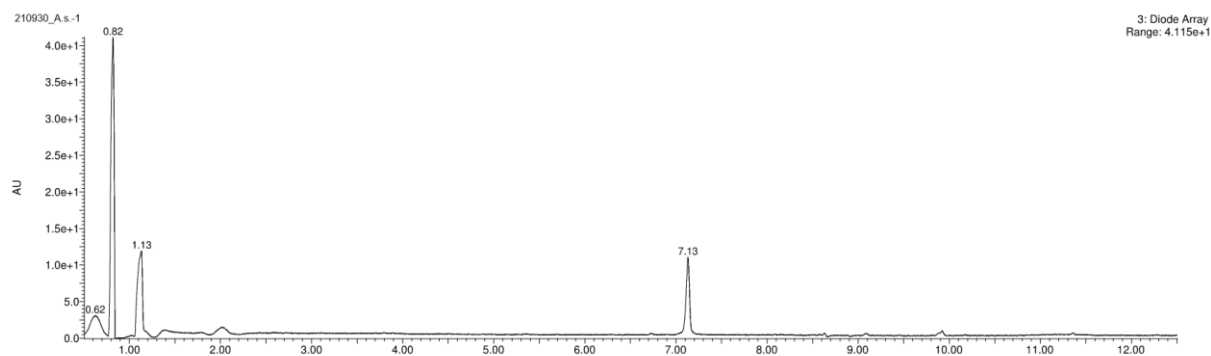

**Figure S2.** UPLC-PDA chromatogram of compound 1.

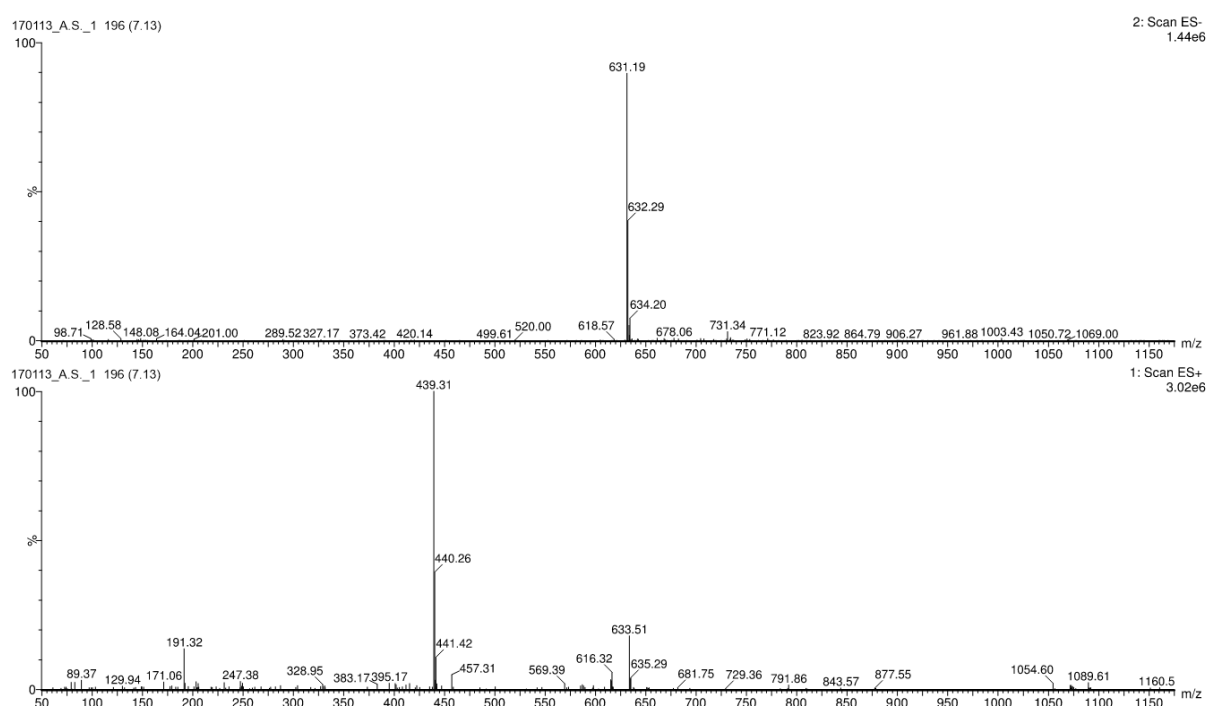

**Figure S3.** ESI-QTOF-MS (negative and positive ion mode) of compound 1.

|                        |                         |                      |         |                        |             |
|------------------------|-------------------------|----------------------|---------|------------------------|-------------|
| Acquisition Time (sec) | 3.4919                  | Date                 |         | Date Stamp             |             |
| File Name              | Atriplex sagittata/AS-1 |                      |         | Frequency (MHz)        | 500.16      |
| Nucleus                | <sup>1</sup> H          | Number of Transients | 8       | Origin                 | ECA         |
| Owner                  | delta                   | Points Count         | 26214   | Pulse Sequence         | proton.jxp  |
| Spectrum Offset (Hz)   | 3251.0396               | Sweep Width (Hz)     | 7507.11 | Temperature (degree C) | 20.700      |
|                        |                         |                      |         | Solvent                | PYRIDINE-d5 |

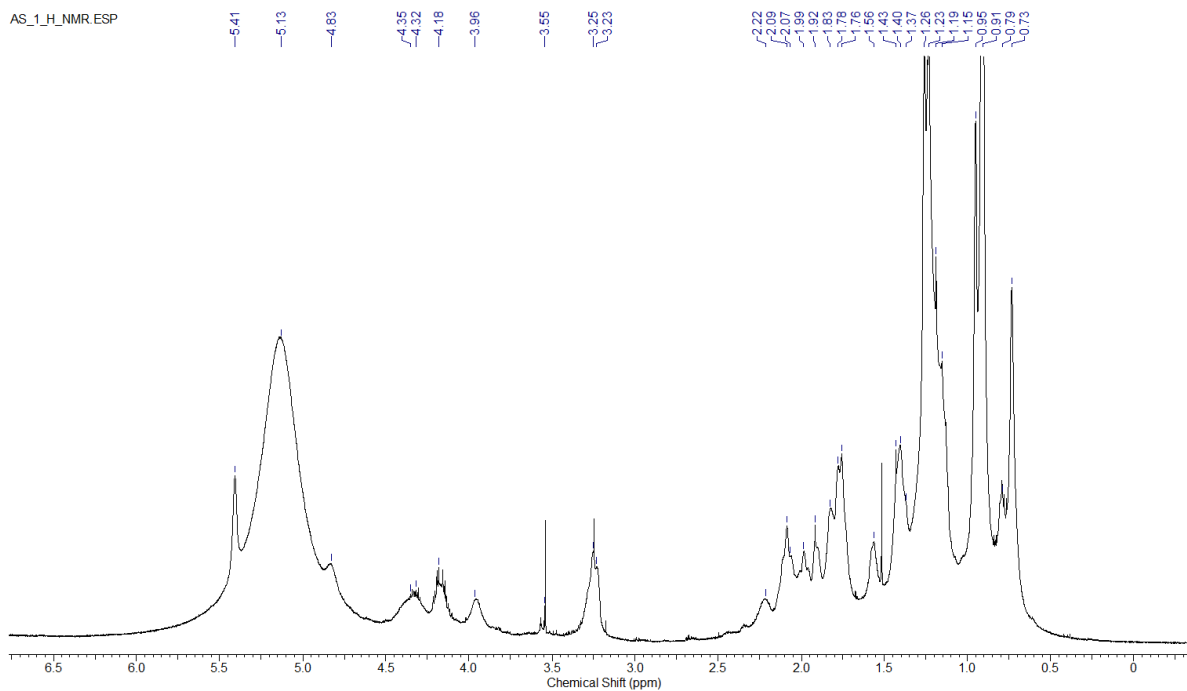

Figure S4. The <sup>1</sup>H NMR (500 MHz, pyridine-d<sub>5</sub>) spectrum of compound 1.

|                        |                         |                      |          |                        |             |
|------------------------|-------------------------|----------------------|----------|------------------------|-------------|
| Acquisition Time (sec) | 1.6568                  | Date                 |          | Date Stamp             |             |
| File Name              | Atriplex sagittata/AN-1 |                      |          | Frequency (MHz)        | 125.77      |
| Nucleus                | <sup>13</sup> C         | Number of Transients | 12288    | Origin                 | ECA         |
| Owner                  | delta                   | Points Count         | 52429    | Pulse Sequence         | carbon.jxp  |
| Spectrum Offset (Hz)   | 12576.5293              | Sweep Width (Hz)     | 31645.09 | Temperature (degree C) | 20.700      |
|                        |                         |                      |          | Solvent                | PYRIDINE-d5 |

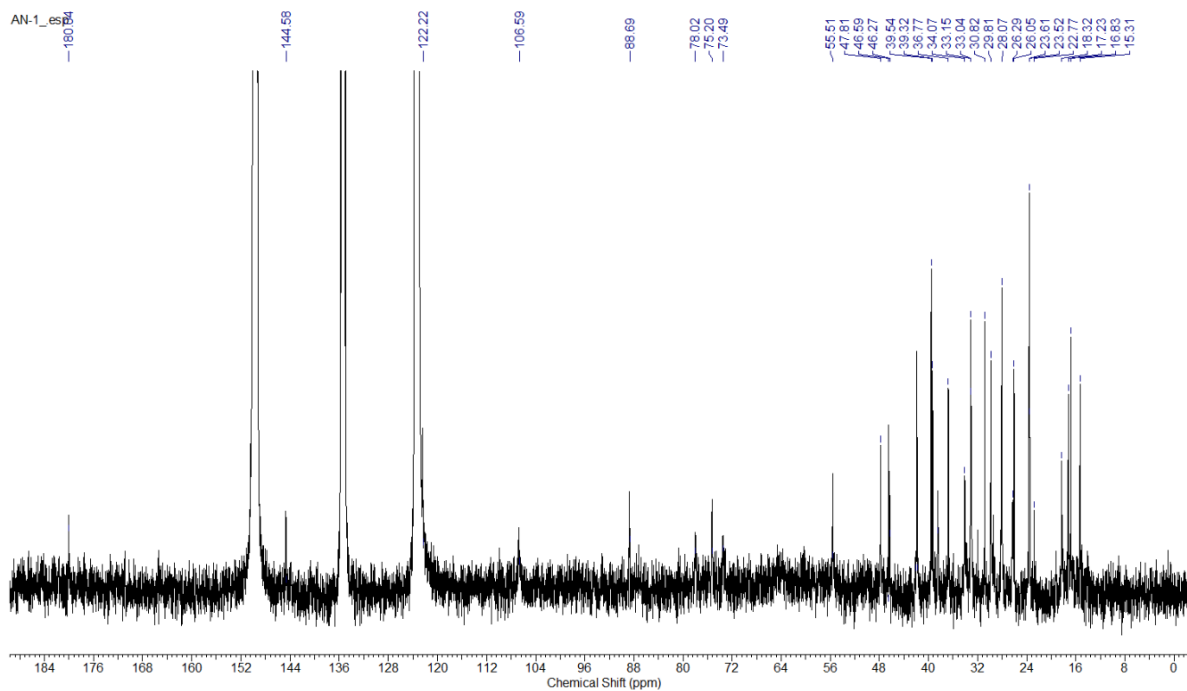

Figure S5. The <sup>13</sup>C NMR (125 MHz, pyridine-d<sub>5</sub>) spectrum of compound 1.

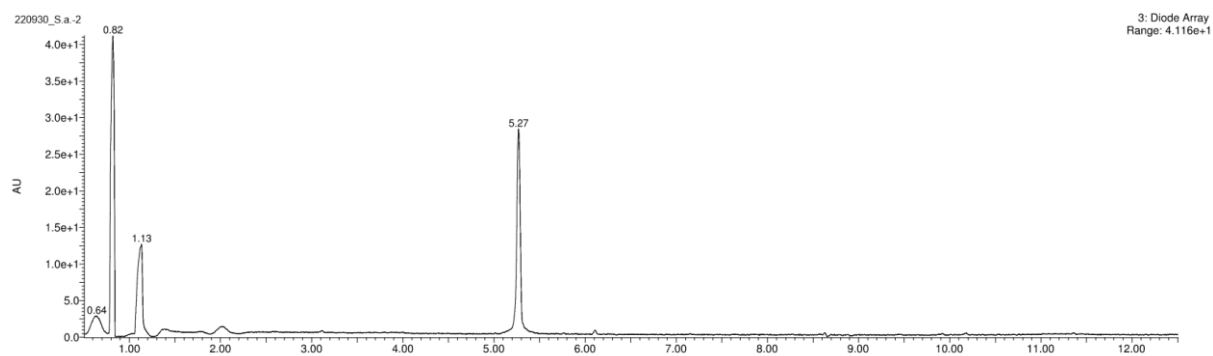

Figure S6. UPLC-PDA chromatogram of compound 2.

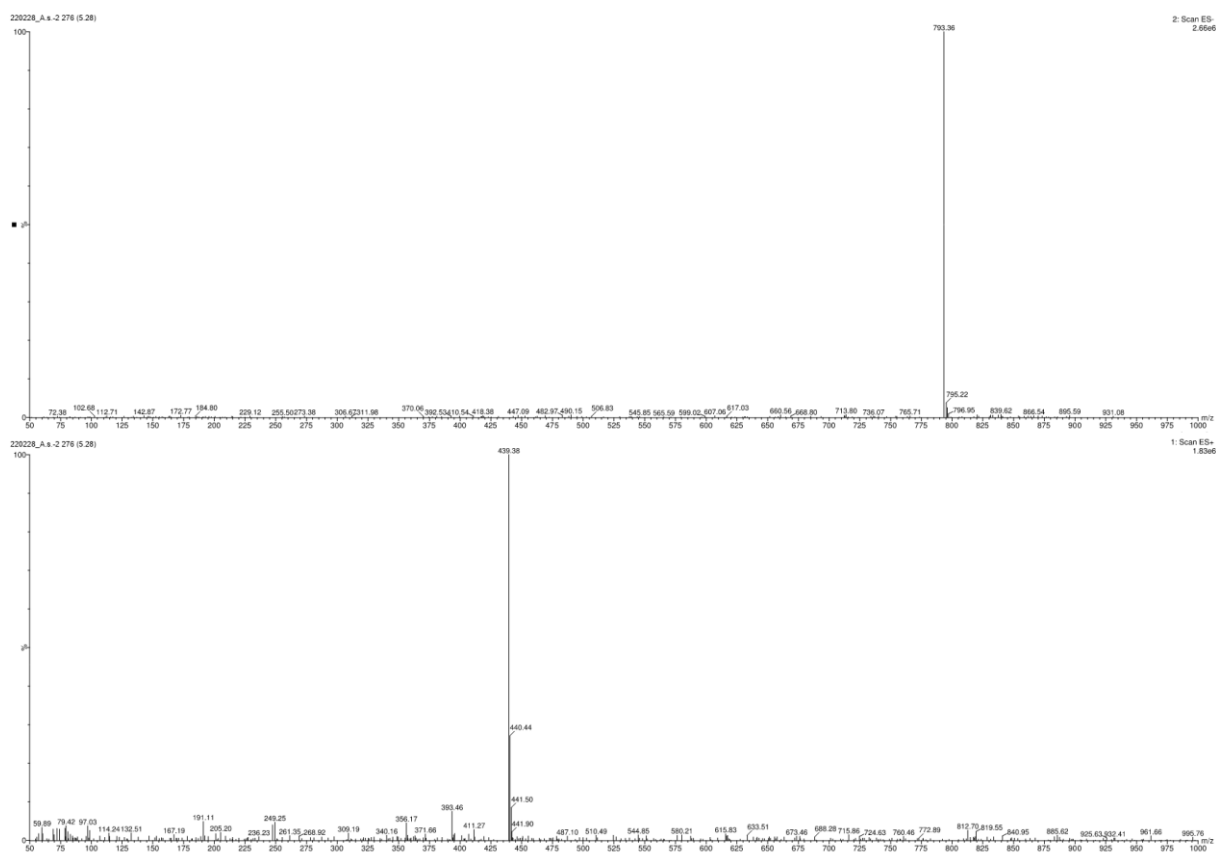

Figure S7. ESI-QTOF-MS (negative and positive ion mode) of compound 2.

AS\_2\_H\_NMR\_1x100

Chemical Shift (ppm)

Integration values (from left to right): 1.00, 5.36, 5.10, 4.77, 4.40, 4.33, 4.31, 4.29, 4.24, 4.23, 4.17, 4.15, 3.98, 3.96, 3.23, 3.15, 2.29, 2.03, 1.91, 1.89, 1.81, 1.75, 1.74, 1.70, 1.53, 1.48, 1.39, 1.28, 1.27, 1.24, 1.21, 1.11, 1.03, 0.91, 0.86, 0.75, 0.70.

| Acquisition Time (sec) | 1.6568                                 | Date                 |                 | Date Stamp             |          |
|------------------------|----------------------------------------|----------------------|-----------------|------------------------|----------|
| File Name              | Atriplex sagittata - compound 2 (AS-2) |                      |                 |                        |          |
| Frequency (MHz)        | 125.77                                 | Nucleus              | <sup>13</sup> C | Number of Transients   | 12288    |
| Original Points Count  | 52429                                  | Owner                | della           | Points Count           | 52429    |
| Solvent                | PYRIDINE-d5                            | Spectrum Offset (Hz) | 12576.5293      | Sweep Width (Hz)       | 31645.09 |
|                        |                                        |                      |                 | Temperature (degree C) | 21.600   |

AN\_2\_C13AC61 esp

Chemical Shift (ppm)

**Figure S9.** The  $^{13}\text{C}$  NMR (125 MHz, pyridine- $d_5$ ) spectrum of compound 2.

**Table S5.** <sup>1</sup>H (500 MHz) and <sup>13</sup>C (125 MHz) NMR spectral data (δ ppm) for compound **1** and **2** (pyridine-d<sub>5</sub>).

| No.          | Compound <b>1</b> |               | Compound <b>2</b> |               |
|--------------|-------------------|---------------|-------------------|---------------|
|              | δC                | δH (J in Hz)* | δC                | δH (J in Hz)* |
| <b>1</b>     | 38.41             | 1.37; 0.79    | 38.48             | 1.28; 0.75    |
| <b>2</b>     | 26.29             | 2.22; 1.78    | 26.26             | 2.29; 1.81    |
| <b>3</b>     | 88.69             | 3.26          | 88.52             | 3.23          |
| <b>4</b>     | 39.32             |               | 39.30             |               |
| <b>5</b>     | 55.51             | 0.73          | 55.53             | 0.70          |
| <b>6</b>     | 18.32             | 1.43; 1.23    | 18.33             | 1.38; 1.21    |
| <b>7</b>     | 33.04             | 1.40; 1.23    | 32.92             | 1.40; 1.24    |
| <b>8</b>     | 39.54             |               | 39.72             |               |
| <b>9</b>     | 47.81             | 1.56          | 47.81             | 1.53          |
| <b>10</b>    | 36.77             |               | 36.75             |               |
| <b>11</b>    | 23.52             | 1.83          | 23.49             | 1.81          |
| <b>12</b>    | 122.22            | 5.41          | 122.75            | 5.36          |
| <b>13</b>    | 144.58            |               | 143.96            |               |
| <b>14</b>    | 42.05             |               | 41.94             |               |
| <b>15</b>    | 29.81             | 2.09; 1.19    | 29.81             | 2.27; 1.14    |
| <b>16</b>    | 22.77             | 2.07; 1.92    | 23.23             | 2.03; 1.91    |
| <b>17</b>    | 46.59             |               | 46.81             |               |
| <b>18</b>    | 41.72             | 3.23          | 41.55             | 3.15          |
| <b>19</b>    | 46.27             | 1.76; 1.26    | 46.03             | 1.74; 1.21    |
| <b>20</b>    | 30.82             |               | 30.62             |               |
| <b>21</b>    | 34.07             | 1.37; 1.15    | 33.83             | 1.27          |
| <b>22</b>    | 33.02             | 1.99; 1.19    | 32.37             | 1.80; 1.70    |
| <b>23</b>    | 28.07             | 1.32          | 28.07             | 1.21          |
| <b>24</b>    | 16.83             | 0.91          | 16.84             | 0.91          |
| <b>25</b>    | 15.31             | 0.78          | 15.40             | 0.75          |
| <b>26</b>    | 17.23             | 0.91          | 17.30             | 1.03          |
| <b>27</b>    | 26.05             | 1.26          | 25.98             | 1.21          |
| <b>28</b>    | 180.04            |               | 176.27            |               |
| <b>29</b>    | 33.16             | 0.91          | 33.02             | 0.86          |
| <b>30</b>    | 23.61             | 0.95          | 23.60             | 0.83          |
| 3-O-β-D-GlcA |                   |               |                   |               |
| <b>1</b>     | 106.59            | 4.83          | 106.57            | 4.77          |
| <b>2</b>     | 75.24             | 3.96          | 75.35             | 3.98          |
| <b>3</b>     | 78.04             | 4.19          | 77.95             | 4.17          |
| <b>4</b>     | 73.44             | 4.32          | 73.48             | 4.23          |
| <b>5</b>     | 77.98             | 4.35          | 77.89             | 4.29          |
| <b>6</b>     | nd                |               | nd                |               |
| 28-O-β-D-Glc |                   |               |                   |               |
| <b>1</b>     |                   |               | 95.32             | 6.26 d (8.0)  |
| <b>2</b>     |                   |               | 73.86             | 4.15          |
| <b>3</b>     |                   |               | 78.74             | 4.21          |
| <b>4</b>     |                   |               | 71.00             | 4.24          |
| <b>5</b>     |                   |               | 79.19             | 3.96          |
| <b>6</b>     |                   |               | 62.07             | 4.40; 4.33    |

\* Overlapping signals are reported without designated multiplicity.
